# Supplementary material for: Use of a Taguchi Design in Hibiscus sabdariffa Extracts Encapsulated by Spray-Drying
Source: PubMed Central journal article supplement (PMC7073635; doi:10.3390/foods9020128), 2020-01-24
Supplement: foods-09-00128-s001.pdf [file foods-09-00128-s001.pdf]

## Supplementary materials

# Use of a Taguchi Design in *Hibiscus sabdariffa* Extracts Encapsulated by Spray-Drying

# Use of a Taguchi Design in *Hibiscus sabdariffa* Extracts Encapsulated by Spray-Drying

Migdalia Sarahy Navidad-Murrieta <sup>1</sup>, Alejandro Pérez-Larios <sup>2</sup>, Jorge Alberto Sánchez-Burgos <sup>1</sup>, Juan Arturo Ragazzo-Sánchez <sup>1</sup>, Gabriel Luna-Bárceñas <sup>3</sup> and Sonia G. Sáyago-Ayerdi <sup>1,\*</sup>

<sup>1</sup> Tecnológico Nacional de México/Instituto Tecnológico de Tepic, Av. Tecnológico 2595, Lagos del Country, Tepic 63175, Nayarit, México; murrieta\_26@hotmail.com (M.S.N.-M.); jragazzo@itteplic.edu.mx (J.A.S.-B.) jsanchezb@itteplic.edu.mx (J.A.R.-S.)

<sup>2</sup> División de Ciencias Agropecuarias e Ingenierías, Centro Universitario de los Altos/Universidad de Guadalajara, Av. Rafael Casillas Aceves 1200, Tepatitlán de Morelos 47600, Jalisco, México; alarios@cualtos.udg.mx

<sup>3</sup> Centro de Investigación y Estudios Avanzados (CINVESTAV) del Instituto Politécnico Nacional, Unidad Querétaro, Libramiento Norponiente 2000, Fracc. Real de Juriquilla, Santiago de Querétaro 76230, Qro., México; gabriel.luna@cinvestav.mx

\* Correspondence: ssayago@itteplic.edu.mx; Tel.: +52-311-211-94-00 ext. 234

Received: 11 November 2019; Accepted: 13 January 2020; Published: 24 January 2020

**Table S1.** Outlet temperature in treatments of *Hibiscus* extracts (*Hibiscus sabdariffa*) spray-drying with different proportions of MD and GA<sup>1,2</sup>.

| Treatment      | Inlet temperature (°C) |
|----------------|------------------------|
| T <sub>1</sub> | 65 ± 0.5               |
| T <sub>2</sub> | 64 ± 0.5               |
| T <sub>3</sub> | 64 ± 0.5               |
| T <sub>4</sub> | 93 ± 0.5               |
| T <sub>5</sub> | 92 ± 0.5               |
| T <sub>6</sub> | 95 ± 0.5               |
| T <sub>7</sub> | 64 ± 0.5               |
| T <sub>8</sub> | 84 ± 1.5               |

<sup>1</sup> 1 Values are the mean (n = 3). <sup>2</sup> MD: Maltodextrin DE 10, GA: Gum arabic.

**Table S2.** ANOVA general linear model results showing p-values of each factor investigated from the Taguchi L8 design on the selected responses variables.

| Variable                                  | SS <sup>1</sup> | Df <sup>2</sup> | MS <sup>3</sup> | F <sup>4</sup> | p        |
|-------------------------------------------|-----------------|-----------------|-----------------|----------------|----------|
| <b>FST Content</b>                        |                 |                 |                 |                |          |
| {1} Solvent of extraction                 | 1155.422        | 1               | 1155.422        | 19320.26       | 0.000000 |
| {4} Extract:carriers ratio (w/w)          | 91.270          | 1               | 91.270          | 1526.17        | 0.000000 |
| {6} Homogenization                        | 11.569          | 1               | 11.569          | 193.45         | 0.000000 |
| {5} Carriers ratio (MD + GA) <sup>5</sup> | 10.970          | 1               | 10.970          | 183.43         | 0.000000 |
| {2} Decoction (°C/min)                    | 1.511           | 1               | 1.511           | 25.27          | 0.000124 |
| {7} Inlet temperatura (°C)                | 0.673           | 1               | 0.673           | 11.26          | 0.004020 |
| {3} <i>Hibiscus</i> concentration         | 0.061           | 1               | 0.061           | 1.02           | 0.326443 |
| Residual                                  | 0.957           | 16              | 0.060           |                |          |

**Table S2. Cont.**

| <b>AOX</b>                        |          |    |          |          |          |
|-----------------------------------|----------|----|----------|----------|----------|
| <u>ABTS</u>                       |          |    |          |          |          |
| {1} Solvent of extraction         | 2414.040 | 1  | 2414.040 | 26792.05 | 0.000000 |
| {2} Decoction (°C/min)            | 56.339   | 1  | 56.339   | 625.28   | 0.000000 |
| {3} <i>Hibiscus</i> concentration | 62.708   | 1  | 62.708   | 695.96   | 0.000000 |
| {4} Extract:carriers ratio (w/w)  | 128.787  | 1  | 128.787  | 1429.33  | 0.000000 |
| {5} Carriers ratio (MD + GA)      | 15.000   | 1  | 15.000   | 166.47   | 0.000000 |
| {6} Homogenization                | 76.048   | 1  | 76.048   | 844.01   | 0.000000 |
| {7} Inlet temperatura (°C)        | 46.757   | 1  | 46.757   | 518.93   | 0.000000 |
| Residual                          | 1.442    | 16 | 0.090    |          |          |
| <u>DPPH</u>                       |          |    |          |          |          |
| {1} Solvent of extraction         | 1322.908 | 1  | 1322.908 | 3359.843 | 0.000000 |
| {4} Extract:carriers ratio (w/w)  | 22.469   | 1  | 22.469   | 57.065   | 0.000001 |
| {2} Decoction (°C/min)            | 20.698   | 1  | 20.698   | 52.568   | 0.000002 |
| {6} Homogenization                | 8.170    | 1  | 8.170    | 20.749   | 0.000324 |
| {3} <i>Hibiscus</i> concentration | 0.833    | 1  | 0.833    | 2.116    | 0.165080 |
| {5} Carriers ratio (MD + GA)      | 0.738    | 1  | 0.738    | 1.874    | 0.189882 |
| {7} Inlet temperatura (°C)        | 0.306    | 1  | 0.306    | 0.776    | 0.391414 |
| Residual                          | 6.300    | 16 | 0.394    |          |          |
| <u>FRAP</u>                       |          |    |          |          |          |
| {1} Solvent of extraction         | 763.3372 | 1  | 763.3372 | 70317.90 | 0.000000 |
| {2} Decoction (°C/min)            | 4.3148   | 1  | 4.3148   | 397.48   | 0.000000 |
| {3} <i>Hibiscus</i> concentration | 3.4680   | 1  | 3.4680   | 319.47   | 0.000000 |
| {4} Extract:carriers ratio (w/w)  | 51.4172  | 1  | 51.4172  | 4736.51  | 0.000000 |
| {5} Carriers ratio (MD + GA)      | 39.7565  | 1  | 39.7565  | 3662.34  | 0.000000 |
| {6} Homogenization                | 17.2442  | 1  | 17.2442  | 1588.52  | 0.000000 |
| {7} Inlet temperatura (°C)        | 54.2813  | 1  | 54.2813  | 5000.35  | 0.000000 |
| Residual                          | 0.1737   | 16 | 0.0109   |          |          |

<sup>1</sup> SS. Sum of Squares

<sup>2</sup> df. Degree of Freedom

<sup>3</sup> MS. Mean Square

<sup>4</sup> F. F- Value

<sup>5</sup> MD: Maltodextrin DE 10, GA: Gum arabic.

**Figure S1.** Taguchi analysis for main effects: a) FST Content, AOX b) ABTS, c) DPPH and d) FRAP, ordinate values are the averaged one for each factor and abscissa shows the difference between highest and lowest response obtained for each independent factor

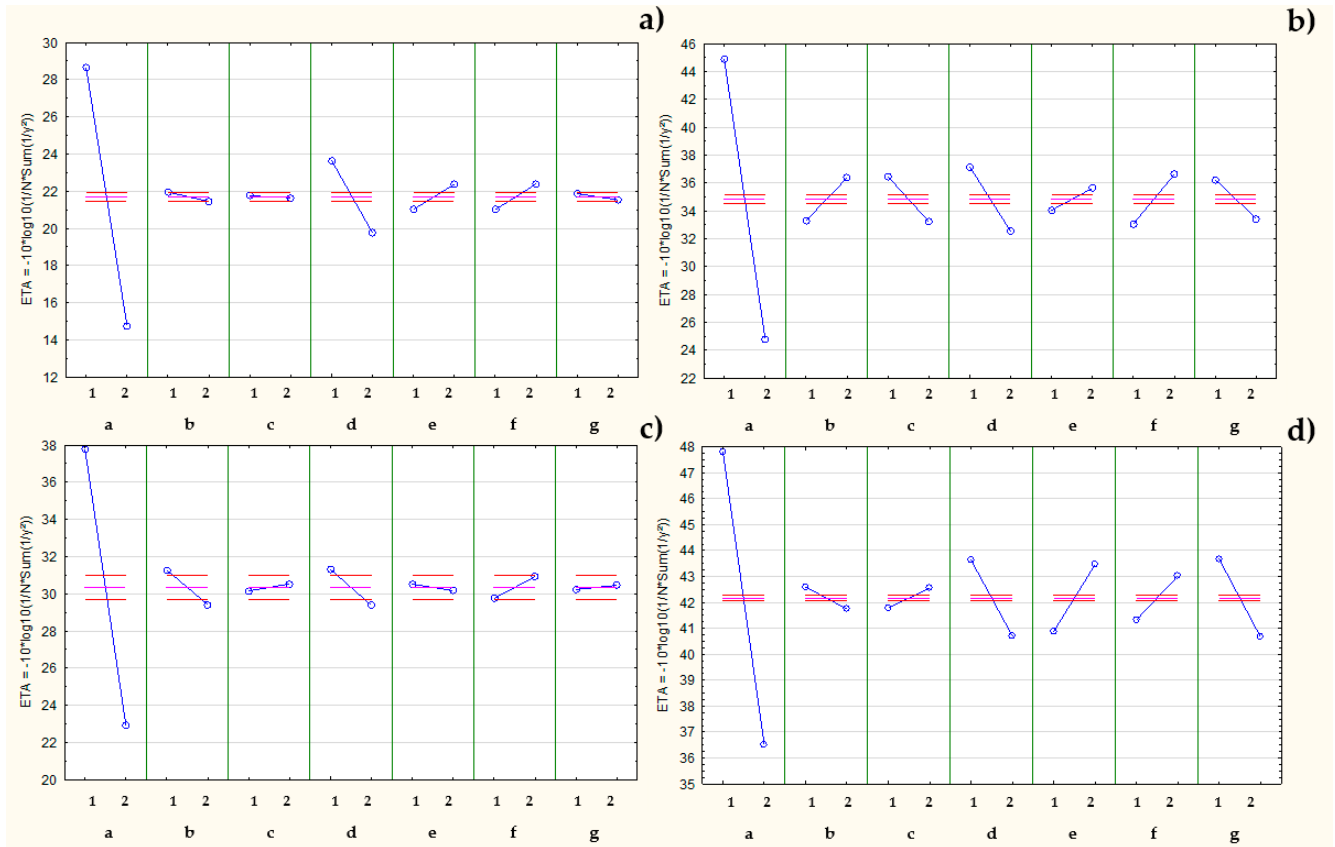

Abscissa values:

| Level | Solvent of extraction | Decoction (°C/min) | <i>Hibiscus</i> concentration (%) | Extract:carriers ratio (w/w) | Carriers ratio (MD + GA) <sup>1</sup> (%) | Homogenization (rpm) | Inlet temperature (°C) |
|-------|-----------------------|--------------------|-----------------------------------|------------------------------|-------------------------------------------|----------------------|------------------------|
|       | (a)                   | (b)                | (c)                               | (d)                          | (e)                                       | (f)                  | (g)                    |
| 1     | Water                 | NA <sup>2</sup>    | 1                                 | 1:1                          | 80:20                                     | 5,000                | 110                    |
| 2     | Ethanol 20%           | 100 / 5            | 2.5                               | 1:2                          | 90:10                                     | 10,000               | 150                    |

<sup>1</sup>. MD: Maltodextrin DE 10, GA: Gum arabic

<sup>2</sup>. NA
